# Supplementary material
Source: Springer Nature journal article supplement (https://www.springermedizin.de/resource/supplementary/12889_2013_7355_MOESM1_ESM.pdf/9496920)
Supplement: MOESM1 [file 9496920]

# Models for Access to Maternal Smoking cessation Support (MAMSS): a study protocol to develop an intervention to increase the engagement of pregnant women who smoke in NHS Stop Smoking Services

## Additional files

### 1. Data items to be extracted from local Patient Administration System

NHS number  
Age (at first maternity appointment)  
Postcode  
Agreed estimated date of delivery  
Employment  
Occupation  
Do you smoke?  
If yes, how many cigarettes do you smoke each day?  
Have you smoked in the last 2  
Treatment sessions? When did you stop smoking?  
Have you been offered advice on how to stop smoking?  
Have risks of smoking been explained to you?  
Have you received written information on how to stop smoking?  
CO reading  
Date of referral to stop smoking services  
Does your current partner smoke?  
Are you exposed to cigarette smoke at home?  
Which groups do you most identify with? (Ethnicity)  
Date and time of birth  
Live / still birth  
Birth weight  
Smoking status at birth  
Gestational age

### 2. Data items to be extracted from NHS stop smoking service database regarding referral

NHS number  
Date referral received  
Name of midwife  
Hospital  
Local Area  
Smoker?  
If ex-smoker date when stopped  
For smokers only, permission to pass details to Stop Smoking Service  
Name  
Address  
Postcode  
Contact telephone number  
Mobile telephone number  
Due date  
CO Reading  
Attempt to contact by telephone 1  
Attempt to contact by telephone 2  
Attempt to contact by telephone 3 (if unsuccessful, letter to be sent)  
Letter Sent  
Accept/reject assessment session appointment  
Client Code  
Date & venue of assessment session appointment  
Advisor

### 3. Data items to be extracted from NHS stop smoking service database regarding treatment

#### Demographics

NHS Number  
 Patient ID  
 Name  
 Gender  
 Address  
 Postcode  
 Telephone number (home, work, mobile)  
 Email address  
 Date of birth  
 Age started smoking  
 Age at time of treatment  
 Age at quit date  
 Ethnicity  
 Occupation  
 Deceased  
 Used service in past year  
 Local Health Board  
 General Practitioner  
 General Practice  
 How heard of service

#### Specialist support needed?

Pregnant?  
 If pregnant, due date  
 Breastfeeding  
 Pre-operative  
 If pre-operative, operation date and hospital

#### Consent

General Practice contact consent  
 Monitoring consent  
 Follow up consent  
 Data protection statement signed

#### Smoking history and nicotine addiction

Previous number of quit attempts  
 Previous NRT use  
 Previous Zyban (bupropion hydrochloride) use  
 Previous Champix (Varenicline) use  
 How soon after waking is first cigarette smoked?  
 Do you find it difficult to refrain from smoking where it is forbidden?  
 Which cigarette would you find it most difficult to give up?  
 Number of cigarettes smoked per day  
 Do you smoke more within first few hours of waking?  
 Do you smoke when ill in bed?  
 Nicotine addiction (Fagerstrom score)

#### Treatment

Initial contact date  
 Appointment within four weeks of initial contact  
 Assessment questionnaire return date  
 Advisor (treating clinician)  
 Venue  
 Venue type

#### Detailed treatment record

Assessment session date  
 Assessment session attendance  
 Assessment session CO reading  
 Treatment session 1 date  
 Treatment session 1 attendance  
 Treatment session 1 CO test attempted  
 Treatment session 1 CO reading  
 Treatment session 2 date  
 Treatment session 2 attendance  
 Treatment session 2 CO test attempted  
 Treatment session 2 CO reading  
 Treatment session 3 date  
 Treatment session 3 attendance  
 Treatment session 3 CO test attempted  
 Treatment session 3 CO reading  
 Treatment session 4 date  
 Treatment session 4 attendance  
 Treatment session 4 CO test attempted  
 Treatment session 4 CO reading  
 Treatment session 5 date  
 Treatment session 5 attendance  
 Treatment session 5 CO test attempted  
 Treatment session 5 CO reading  
 Treatment session 6 date  
 Treatment session 6 attendance  
 Treatment session 6 CO test attempted  
 Treatment session 6 CO reading  
 General practitioner pharmacotherapy letter given?  
 Pharmacy pharmacotherapy letter given?

#### Outcome measures

Attended treatment session  
 Set quit date  
 Treated smoker  
 4 week follow up completed  
 4 week follow up completion date  
 4 week self-reported quit status  
 4 week CO test reading  
 CO reading confirms self-reported 4 week quit status  
 52 week follow up completed  
 52 week self-reported quit status
